# Supplementary material for: Fatal amyloid formation in a patient’s antibody light chain is caused by a single point mutation
Source: eLife. 2020 Mar 10;9:e52300. doi: 10.7554/eLife.52300 (PMC7064341; doi:10.7554/eLife.52300)
Supplement: Figure 1—figure supplement 1—source data 1. [file elife-52300-fig1-figsupp1-data1.xlsx]

## Sheet: Tabelle1
residue nr.	Kabat nomenclature	"germline"	residue aa	Relative Frequency [%]
		WT-1 frequency	Pat-1	Pat-1	WT-1
1	L1	30	Q	30	Q
2	L2	29	S	29	S
3	L3	10	A	10	A
4	L4	65	L	65	L
5	L5	87	T	87	T
6	L6	90	Q	90	Q
7	L7	40	P	40	P
8	L8	8	A	8	A
9	L9	66	S	66	S
	L10		/		/
10	L11	33	V	33	V
11	L12	88	S	88	S
12	L13	19	G	19	G
13	L14	70	S	70	S
14	L15	61	L	12	P
15	L16	98	G	98	G
16	L17	38	Q	38	Q
17	L18	13	S	13	S
18	L19	7	I	7	I
19	L20	77	T	77	T
20	L21	72	I	72	I
21	L22	52	S	52	S
22	L23	99	C	99	C
23	L24	16	T	16	T
24	L25	37	G	37	G
25	L26	10	S	74	T
26	L27	26	S	26	S
27	L27A	78	N	2	S
28	L27B	23	D	23	D
29	L27C	44	F	2	V
30	L28	21	G	21	G
31	L29	31	D	1	G
32	L30	11	Y	11	Y
33	L31	39	N	39	N
34	L32	55	Y	55	Y
35	L33	33	V	33	V
36	L34	20	S	20	S
37	L35	100	W	100	W
38	L36	90	Y	90	Y
39	L37	92	Q	92	Q
40	L38	90	Q	90	Q
41	L39	8	H	8	H
42	L40	92	P	92	P
43	L41	97	G	97	G
44	L42	32	K	32	K
45	L43	74	A	74	A
46	L44	100	P	100	P
47	L45	49	K	49	K
48	L46	83	L	83	L
49	L47	6	M	6	M
50	L48	88	I	88	I
51	L49	85	Y	85	Y
52	L50	12	D	19	E
53	L51	12	V	12	V
54	L52	70	D	3	S
55	L53	23	N	23	N
56	L54	70	R	70	R
57	L55	38	P	38	P
58	L56	73	S	73	S
59	L57	96	G	96	G
60	L58	60	V	60	V
61	L59	8	S	8	S
62	L60	5	N	5	N
63	L61	98	R	98	R
64	L62	98	F	98	F
65	L63	94	S	94	S
66	L64	97	G	97	G
67	L65	96	S	96	S
68	L66	25	K	25	K
69	L67	95	S	95	S
70	L68	94	G	94	G
71	L69	21	N	21	N
72	L70	20	T	20	T
73	L71	39	A	39	A
74	L72	25	S	25	S
75	L73	97	L	97	L
76	L74	74	T	74	T
77	L75	96	I	96	I
78	L76	77	S	77	S
79	L77	39	G	39	G
80	L78	77	V	13	L
81	L79	67	L	1	Q
82	L80	33	A	33	A
83	L81	78	E	78	E
84	L82	99	D	99	D
85	L83	43	E	43	E
86	L84	90	A	90	A
87	L85	39	D	39	D
88	L86	99	Y	99	Y
89	L87	91	F	7	Y
90	L88	100	C	100	C
91	L89	6	S	6	S
92	L90	19	S	19	S
93	L91	40	Y	40	Y
94	L92	7	T	7	T
95	L93	45	S	45	S
96	L94	41	S	41	S
97	L95	11	S	11	S
98	L95A	14	T	14	T
99	L95B	6	L	6	L
100	L96	14	Y	14	Y
101	L97	38	V	38	V
102	L98	98	F	98	F
103	L99	99	G	99	G
104	L100	11	S	1	T
105	L101	99	G	99	G
106	L102	99	T	99	T
107	L103	85	K	85	K
108	L104	52	V	52	V
109	L105	43	T	43	T
110	L106	46	V	46	V
111	L106A	100	L	100	L
112	L107	23	G	23	G
