# Supplementary material for: Fatal amyloid formation in a patient’s antibody light chain is caused by a single point mutation
Source: eLife. 2020 Mar 10;9:e52300. doi: 10.7554/eLife.52300 (PMC7064341; doi:10.7554/eLife.52300)
Supplement: Figure 7—source data 1. [file elife-52300-fig7-data1.xlsx]

## Sheet: Tabelle1
Reaction coordinate d	Free energy	Free energy	Free energy	Free energy
Å	kcal/mol	kcal/mol	kcal/mol	kcal/mol
	WT-1	Pat-1	Pat-1 V81L	Pat-1 L15P V81L
12.31	4.52467	4.62522	5.28791	5.54642
12.45	2.97951	3.00281	3.56303	3.70594
12.59	1.7792	1.75657	2.0932	2.36935
12.73	0.92567	0.87958	1.0568	1.30668
12.87	0.34477	0.36163	0.41617	0.55316
13.01	0.04116	0.11808	0.11799	0.15148
13.15	0	0.03183	0	0
13.29	0.22739	0	0.01656	0.02828
13.43	0.69922	0.16312	0.20377	0.23228
13.57	1.3918	0.59584	0.58908	0.6083
13.71	2.23839	1.28506	1.11211	1.09309
13.85	3.0734	2.20255	1.66683	1.5582
13.99	3.60728	3.07564	2.10889	1.9269
14.13	3.84378	3.42489	2.51105	2.22487
14.27	4.06613	3.60481	2.93329	2.48498
14.41	4.37193	3.84643	3.35144	2.78124
14.55	4.67657	4.08146	3.73582	3.09197
14.69	5.00638	4.3015	4.04986	3.39599
14.83	5.35872	4.55183	4.31562	3.72853
14.97	5.65914	4.88712	4.57113	4.10011
15.11	5.92205	5.29749	4.8758	4.56128
15.25	6.231	5.71544	5.22245	5.01101
15.39	6.59588	6.10517	5.60192	5.37916
15.53	6.93386	6.52062	5.99665	5.70784
15.67	7.18448	6.9301	6.38393	5.99186
15.81	7.34388	7.18918	6.72097	6.19428
15.95	7.48038	7.30868	6.97695	6.34707
16.09	7.6685	7.41768	7.22014	6.52487
16.23	7.90098	7.59425	7.47795	6.72298
16.37	8.22456	7.87127	7.78858	6.98803
16.51	8.61183	8.21001	8.16274	7.31591
16.65	9.01874	8.64726	8.57043	7.75785
16.79	9.42099	9.10331	8.95378	8.22166
16.93	9.89041	9.47166	9.24914	8.52877
17.07	10.41262	9.617	9.37363	8.55402
17.21	10.96166	9.6323	9.44735	8.55407
17.35	11.26969	9.61943	9.55056	8.63828
17.49	11.21946	9.61762	9.72225	8.78143
17.63	11.03112	9.6329	9.99086	8.9343
17.77	10.88669	9.67503	10.38367	8.96271
17.91	10.78947	9.75277	10.84436	8.88727
18.05	10.75674	9.88349	11.34597	8.81013
18.19	10.78491	10.05417	11.5741	8.75843
18.33	10.82898	10.18877	11.37841	8.76962
18.47	10.86844	10.24666	11.16761	8.8044
18.61	10.835	10.16345	11.00306	8.76833
18.75	10.7828	10.05864	10.93119	8.71418
18.89	10.74654	9.99915	10.91888	8.68574
19.03	10.75842	9.96941	10.95626	8.69724
19.17	10.79117	10.03092	11.05208	8.75505
19.31	10.81762	10.10759	11.15918	8.9063
19.45	10.83594	10.13168	11.21721	8.98973
19.59	10.85309	10.11659	11.19567	8.96031
19.73	10.89979	10.04791	11.1674	8.89207
19.87	11.05437	10.04376	11.18637	8.7927
20.01	11.2784	10.11876	11.29231	8.7783
20.15	11.55267	10.26052	11.46848	8.81862
20.29	11.74469	10.41413	11.64799	8.89451
20.43	11.72082	10.46679	11.75056	8.94271
20.57	11.59672	10.43151	11.6889	8.99083
20.71	11.49708	10.34725	11.56978	9.0122
20.85	11.48915	10.33464	11.47414	9.037
20.99	11.55395	10.39353	11.43988	9.13686
21.13	11.67216	10.52452	11.483	9.28779
21.27	11.81645	10.66974	11.54365	9.41948
21.41	11.88163	10.75677	11.58521	9.46566
21.55	11.89334	10.73	11.58184	9.44405
21.69	11.86087	10.68474	11.58938	9.40325
21.83	11.88891	10.66147	11.63393	9.43941
21.97	11.99097	10.70747	11.74382	9.51353
22.11	12.09802	10.78939	11.88905	9.66788
22.25	12.26776	10.9027	12.11736	9.87905
22.39	12.48219	11.02784	12.33549	10.11367
22.53	12.76385	11.25051	12.64423	10.42543
